# Supplementary material for: The first one-fold inclined 1D → 3D polycatenation assembly from unique interweaving triple-stranded helices
Source: Royal Society of Chemistry journal article supplement (doi:10.1039/c3ce27061k), 2013-01-01
Supplement: c3ce27061k.pdf [file c3ce27061k.pdf]

## Electronic Supplementary Information

### The first one-fold inclined 1D→3D polycatenation assembled from unique interweaving triple-stranded helices

Yong-Liang Liu,<sup>a</sup> Ke-Fen Yue,<sup>\*a</sup> Dong-Sheng Li,<sup>\*b,c</sup> Yang Yu,<sup>a</sup> Lei Hou,<sup>a</sup>  
Yao-Yu Wang<sup>a</sup>

<sup>a</sup>Key Laboratory of Synthetic and Natural Functional Molecule Chemistry of the Ministry of Education, Shaanxi Key Laboratory of Physico-Inorganic Chemistry, College of Chemistry and Materials Science, Northwest University, Xi'an 710069, PR China.

<sup>b</sup>College of Mechanical and Material Engineering, China Three Gorges University, Yichang 443002, PR China.

<sup>c</sup>Coordination Chemistry Institute and the State Key Laboratory of Coordination Chemistry, School of Chemistry and Chemical Engineering, Nanjing University, Nanjing 210093, P. R. China

*CrystEngComm*

Corresponding authors:

E-mail: ykflyy@nwu.edu.cn (K.-F. Yue), Tel./Fax: +86 29 88302604.

E-mail: lidongsheng1@126.com(D.-S. Li), Tel./Fax:+86 0717 6397516.

**Materials.** Bib was prepared by 2-methylimidazole with 1,4-dichlorobutane [1]. The other chemicals were obtained commercially and used without further purification.

**General Characterization and Physical Measurements.** The powder X-ray diffraction pattern was collected on a Rigaku D/Max 3III diffractometer. Thermogravimetric analysis (TGA) was performed on a NETZSCH STA 449C thermogravimetric analyzer with a heating rate of 10 °C·min<sup>-1</sup> under a flow of N<sub>2</sub> atmosphere. Elemental analyses of C, H, and N were performed on a Perkin–Elmer 240C automatic analyzer. IR spectrum was recorded on a FT-IR 170 SX (Nicolet) spectrophotometer (4000–400 cm<sup>-1</sup> region) using KBr pellets.

**Experimental data for 1:** A mixture of 1,4-bis(2-methyl-imidazol-1-yl)(bib) (0.0218 g, 0.1 mmol), 5-Hydroxyisophthalic acid (5-OIPA) (0.0182 g, 0.1 mmol) in 5 mL CH<sub>3</sub>OH was layered onto a solution of Co(NO<sub>3</sub>)<sub>2</sub>·6H<sub>2</sub>O (0.0291 g, 0.1 mmol) in 5 mL H<sub>2</sub>O. The resulting mixture was kept peacefully at room temperature. Purple strip crystals of **1** were obtained after two week. Yield: 55%. Anal. calcd for C<sub>20</sub>H<sub>38</sub>N<sub>4</sub>O<sub>11</sub>Co (569.37): C, 42.15; H, 6.67; N, 9.84%. Found: C, 42.33; H, 6.52; N, 9.71%. IR (KBr, cm<sup>-1</sup>): 3432(s), 3134(s), 1663(m), 1619(m), 1555(m), 1452(m), 1401(s), 1279(w), 1159(w), 1004(w), 746(w), 678(w), 587(w).

**Crystal data for 1:** The crystallographic data for **1** was carried out on a Bruker SMART APEX II CCD diffractometer equipped with a graphite monochromated Mo-K $\alpha$  radiation ( $\lambda=0.71073$  Å) at 293 K. The structure was solved by direct methods and refined by the full-matrix least-square techniques using the SHELXL program [2-3]. Semi-empirical absorption correction was applied using multi-scan techniques by the SADABS program [4]. All non-hydrogen atoms were located from the difference Fourier syntheses. All hydrogen atoms attached to the organic ligands were placed geometrically with riding model. In complex **1**, the C6 and C11 atoms are disordered and refined into two positions with multiplicities of 0.5/0.5. The H atoms of disordered carbon atoms and lattice water molecules could not be located reasonably, but were included in the formula. CCDC number of compound **1** is

895871. The crystallographic data is summarized in Table S1 and the selected bond lengths and angles is listed in Table S2.

**Table S1.** Crystal data and structure refinement for **1**.

| Complex                                                    | <b>1</b>                                                          |
|------------------------------------------------------------|-------------------------------------------------------------------|
| formula                                                    | C <sub>20</sub> H <sub>25</sub> N <sub>4</sub> O <sub>11</sub> Co |
| formula wt                                                 | 556.37                                                            |
| crystal system                                             | Tetragonal                                                        |
| space group                                                | <i>I</i> -42 <i>d</i>                                             |
| <i>a</i> (Å)                                               | 11.8179(10)                                                       |
| <i>b</i> (Å)                                               | 11.8179(10)                                                       |
| <i>c</i> (Å)                                               | 37.714(5)                                                         |
| $\alpha$ (°)                                               | 90                                                                |
| $\beta$ (°)                                                | 90                                                                |
| $\gamma$ (°)                                               | 90                                                                |
| <i>V</i> (Å <sup>3</sup> )                                 | 5267.2(9)                                                         |
| <i>Z</i>                                                   | 8                                                                 |
| $\rho$ (g cm <sup>-3</sup> )                               | 1.403                                                             |
| $\mu$ (mm <sup>-1</sup> )                                  | 0.713                                                             |
| <i>F</i> (000)                                             | 2304                                                              |
| collected reflns                                           | 13953                                                             |
| unique reflns                                              | 2604                                                              |
| <i>R</i> <sub>1</sub> [ <i>I</i> >2 $\sigma$ ( <i>I</i> )] | 0.0659                                                            |
| <i>wR</i> <sub>2</sub> (all data)                          | 0.2097                                                            |

**Table S2.** Selected bond distances (Å) and angles (°) for **1**.

| Complex <b>1</b> |          |                   |          |
|------------------|----------|-------------------|----------|
| Co(1)-N(1)       | 2.035(6) | O(2)#1-Co(1)-O(2) | 138.5(2) |
| Co(1)-N(1)#1     | 2.035(6) | N(1)-Co(1)-O(1)#1 | 162.5(2) |

|                     |          |                     |           |
|---------------------|----------|---------------------|-----------|
| Co(1)-O(2)#1        | 2.118(4) | N(1)#1-Co(1)-O(1)#1 | 86.4(2)   |
| Co(1)-O(2)          | 2.118(4) | O(2)#1-Co(1)-O(1)#1 | 60.18(18) |
| Co(1)-O(1)#1        | 2.238(4) | O(2)-Co(1)-O(1)#1   | 88.60(19) |
| Co(1)-O(1)          | 2.238(4) | N(1)-Co(1)-O(1)     | 86.4(2)   |
| N(1)-Co(1)-N(1)#1   | 105.6(3) | N(1)#1-Co(1)-O(1)   | 162.5(2)  |
| N(1)-Co(1)-O(2)#1   | 104.4(2) | O(2)#1-Co(1)-O(1)   | 88.60(19) |
| N(1)#1-Co(1)-O(2)#1 | 100.3(2) | O(2)-Co(1)-O(1)     | 60.18(18) |
| N(1)-Co(1)-O(2)     | 100.3(2) | O(1)#1-Co(1)-O(1)   | 85.1(3)   |
| N(1)#1-Co(1)-O(2)   | 104.4(2) |                     |           |

Symmetry transformations used to generate equivalent atoms: #1 -x,-y+1, z; #2 x, -y+1/2, -z+1/4; #3 -x,-y, z

1 X.Y.Huang,K.F.Yue,J.C.Jin,J.Q.Liu,C.J.Wang,Y.Y.Wang,Inorg.Chem.Commun,2010,13,338.

2 G. M. Sheldrick, SHELXS-97, Program for the Crystal Structure Solution; University of Göttingen: Göttingen, Germany, 1997.

3 G. M. Sheldrick, SHELXL-97, Program for the Refinement of Crystal Structure; University of Göttingen: Göttingen, Germany, 1997.

4 G.M.Sheldrick, SADABS, Program for Bruker Area Detector Absorption Correction; University of Göttingen: Göttingen, Germany, 1997.

**Table S3** Summary of the linking modes of the 6-, 8- and 10-membered shortest ring within 3D net of **1**

|              | Cycle 1 | Cycle 2 | Chain <sup>a</sup> | Cross <sup>b</sup> | Mult <sup>c</sup> |
|--------------|---------|---------|--------------------|--------------------|-------------------|
|              | 6a      | 6a      | inf.               | 1                  | 1                 |
|              | 6a      | 8a      | inf.               | 1                  | 2                 |
| <sup>a</sup> | 6a      | 10a     | inf.               | 1                  | 3                 |
|              | 8a      | 6a      | inf.               | 1                  | 2                 |
|              | 8a      | 8a      | inf.               | 1                  | 4                 |
|              | 8a      | 10a     | inf.               | 1                  | 6                 |
|              | 10a     | 6a      | inf.               | 1                  | 3                 |
|              | 10a     | 8a      | inf.               | 1                  | 6                 |
|              | 10a     | 10a     | inf.               | 1                  | 9                 |

<sup>a</sup> Chain: the bond amount of the shortest chain that interconnected two rings.

<sup>b</sup> Cross: the times of each ring crossing another ring.

<sup>c</sup> Mult: the ring numbers of each ring crossed by other one

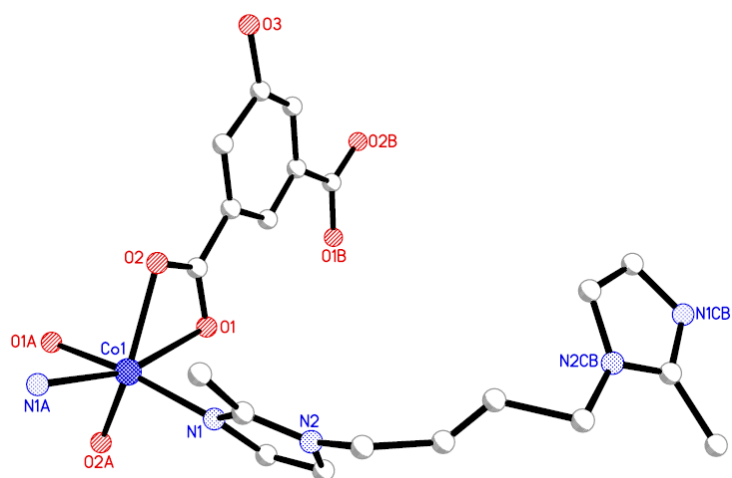

**Fig. S1** The coordination environment of the Co(II) ions in **1** (Symmetry codes: A  $-x, -y+1, z$ ; B  $x, -y+1/2, -z+1/4$ ;) )

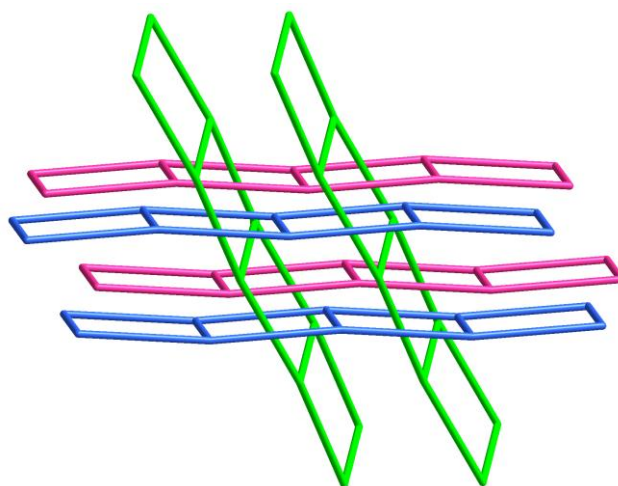

**Fig.S2** Perspective view of the two-fold polycatenated ladders

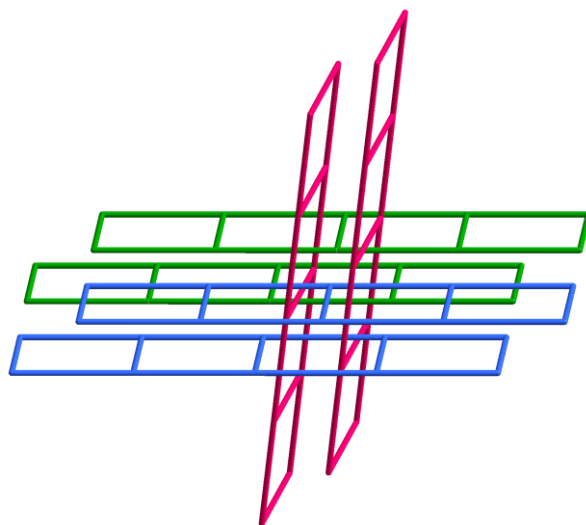

**Fig.S3** Perspective view of the four-fold polycatenated ladders

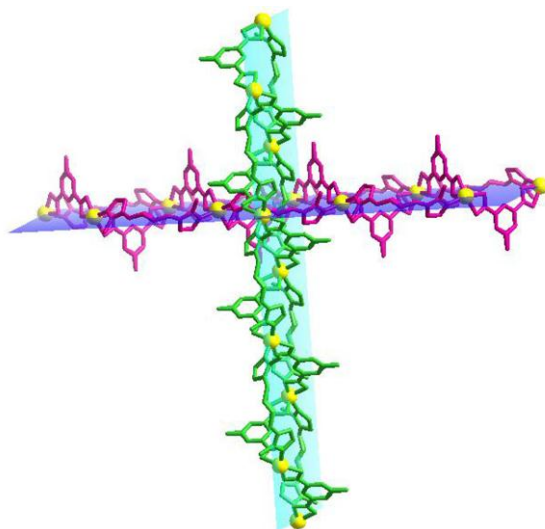

**Fig. S4** A view of one left-handed interweaving triple-stranded helices (green) interlocked with adjacent one right-handed interweaving triple-stranded helices (purple) in vertical fashion.

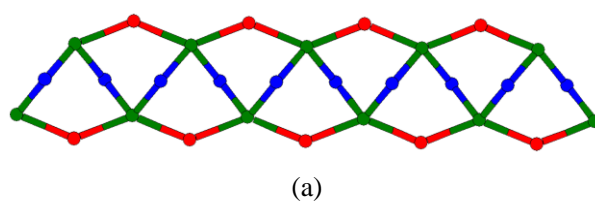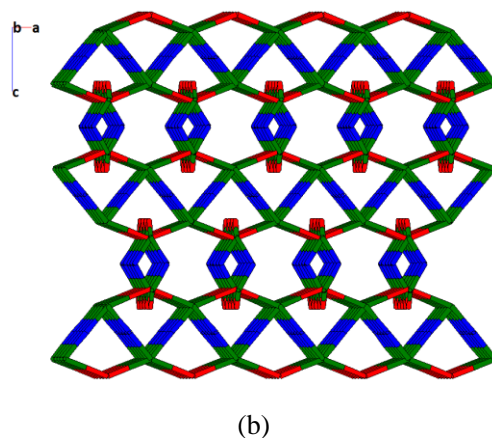

**Fig. S5** (a) Single (2,2,4)-connected trinodal network with the point symbol of  $(6)_2(6^3 \cdot 8^2 \cdot 10)$ .  
(b) 1D→3D topological network with vertical interlocking pattern (red for bib, blue for  $\text{hoip}^{2-}$  and green for  $\text{Co}^{2+}$ ).

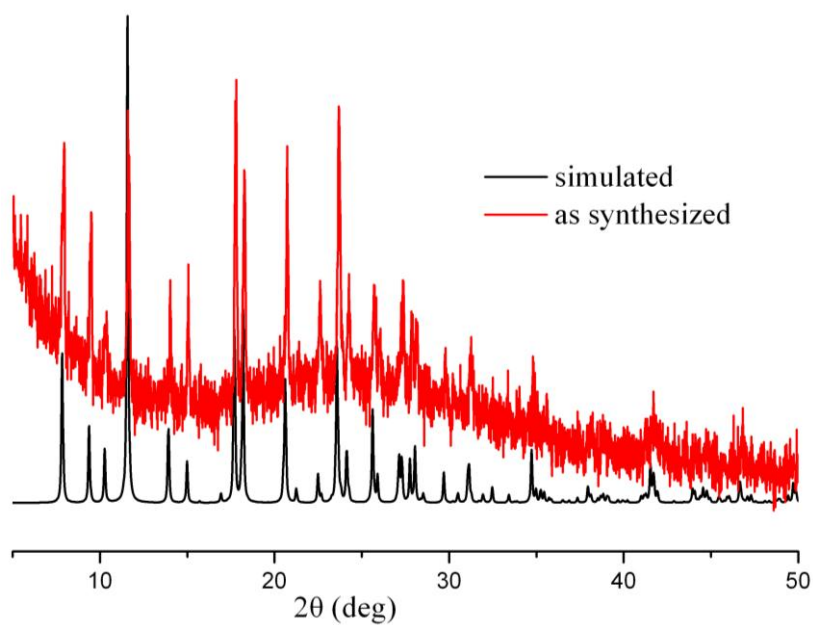

**Fig. S6.** Comparison of XRPD patterns of the simulated pattern from the single-crystal structure determination and the as-synthesized product

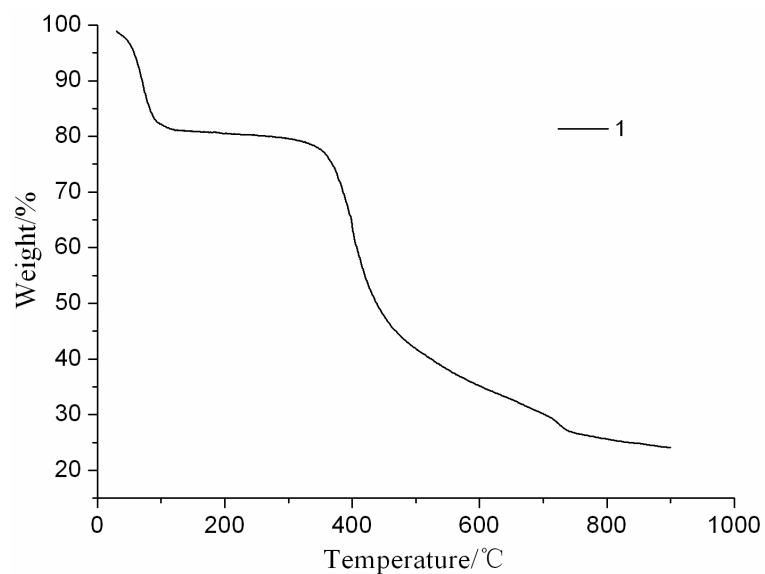

**Fig. S7.** TGA curves of compound 1 under N<sub>2</sub> atmosphere.

Thermogravimetric analysis (TGA) was performed on a heating rate of 10 °C·min<sup>-1</sup> under a flow of N<sub>2</sub> atmosphere. The TGA indicates that the first weight loss occurs at 120 °C, weight loss rate is 18.79% ,corresponding to the removal of the three water molecules(calcd:19.41%). The collapse of the polycatenation framework occurs in the temperature range of 350–900 °C.
